# Supplementary material for: A novel human protein-coding locus identified using a targeted RNA enrichment technique
Source: PubMed Central journal article supplement — BMC Biol. 2024 Nov 26;22:273. doi: 10.1186/s12915-024-02069-8 (PMC11590353; doi:10.1186/s12915-024-02069-8), 2024-11-26
Supplement: 12915_2024_2069_MOESM2_ESM.pdf [file 12915_2024_2069_MOESM2_ESM.pdf]

A

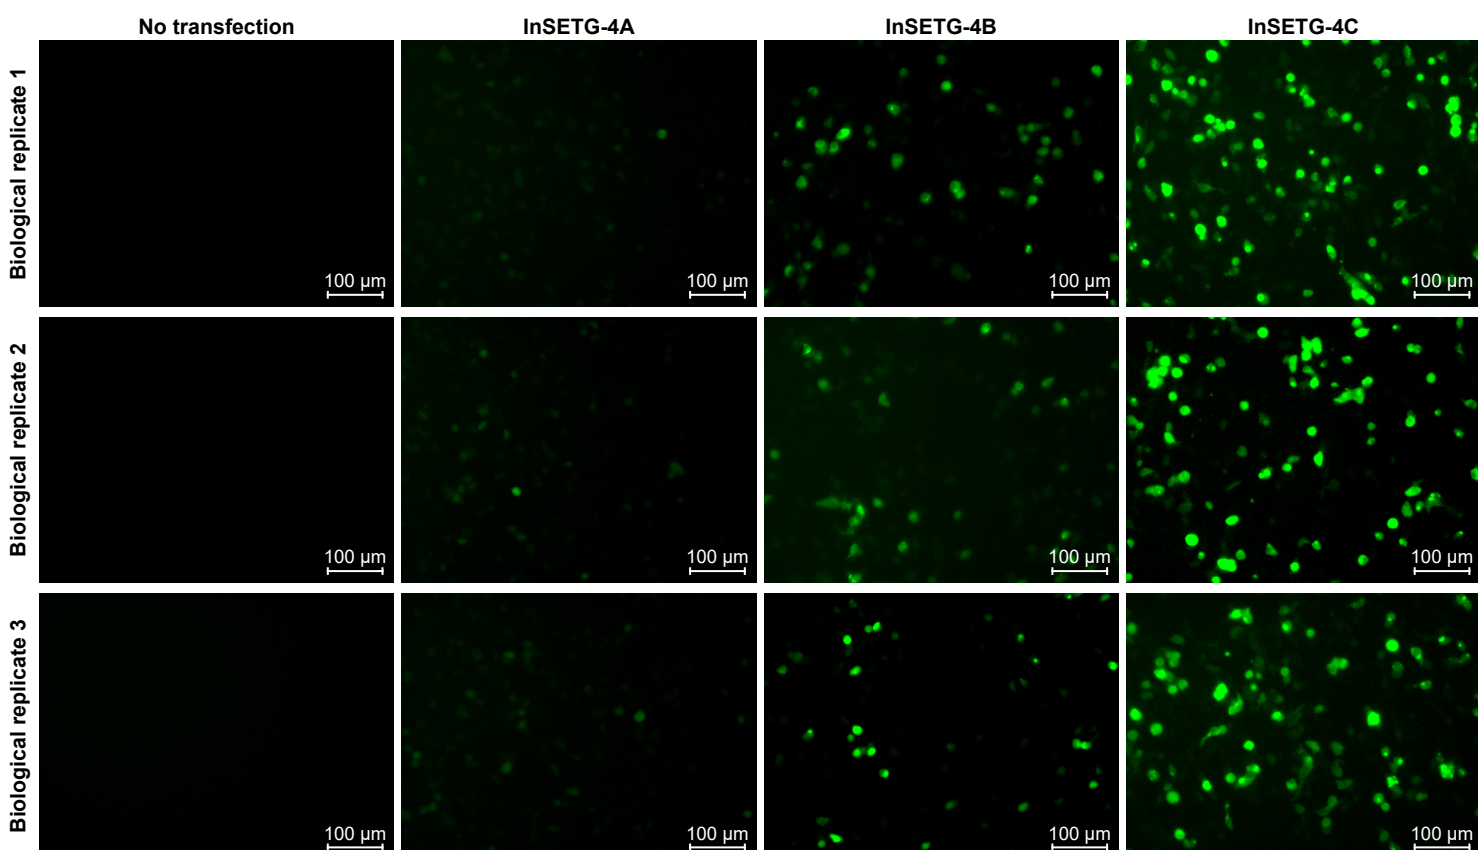

B

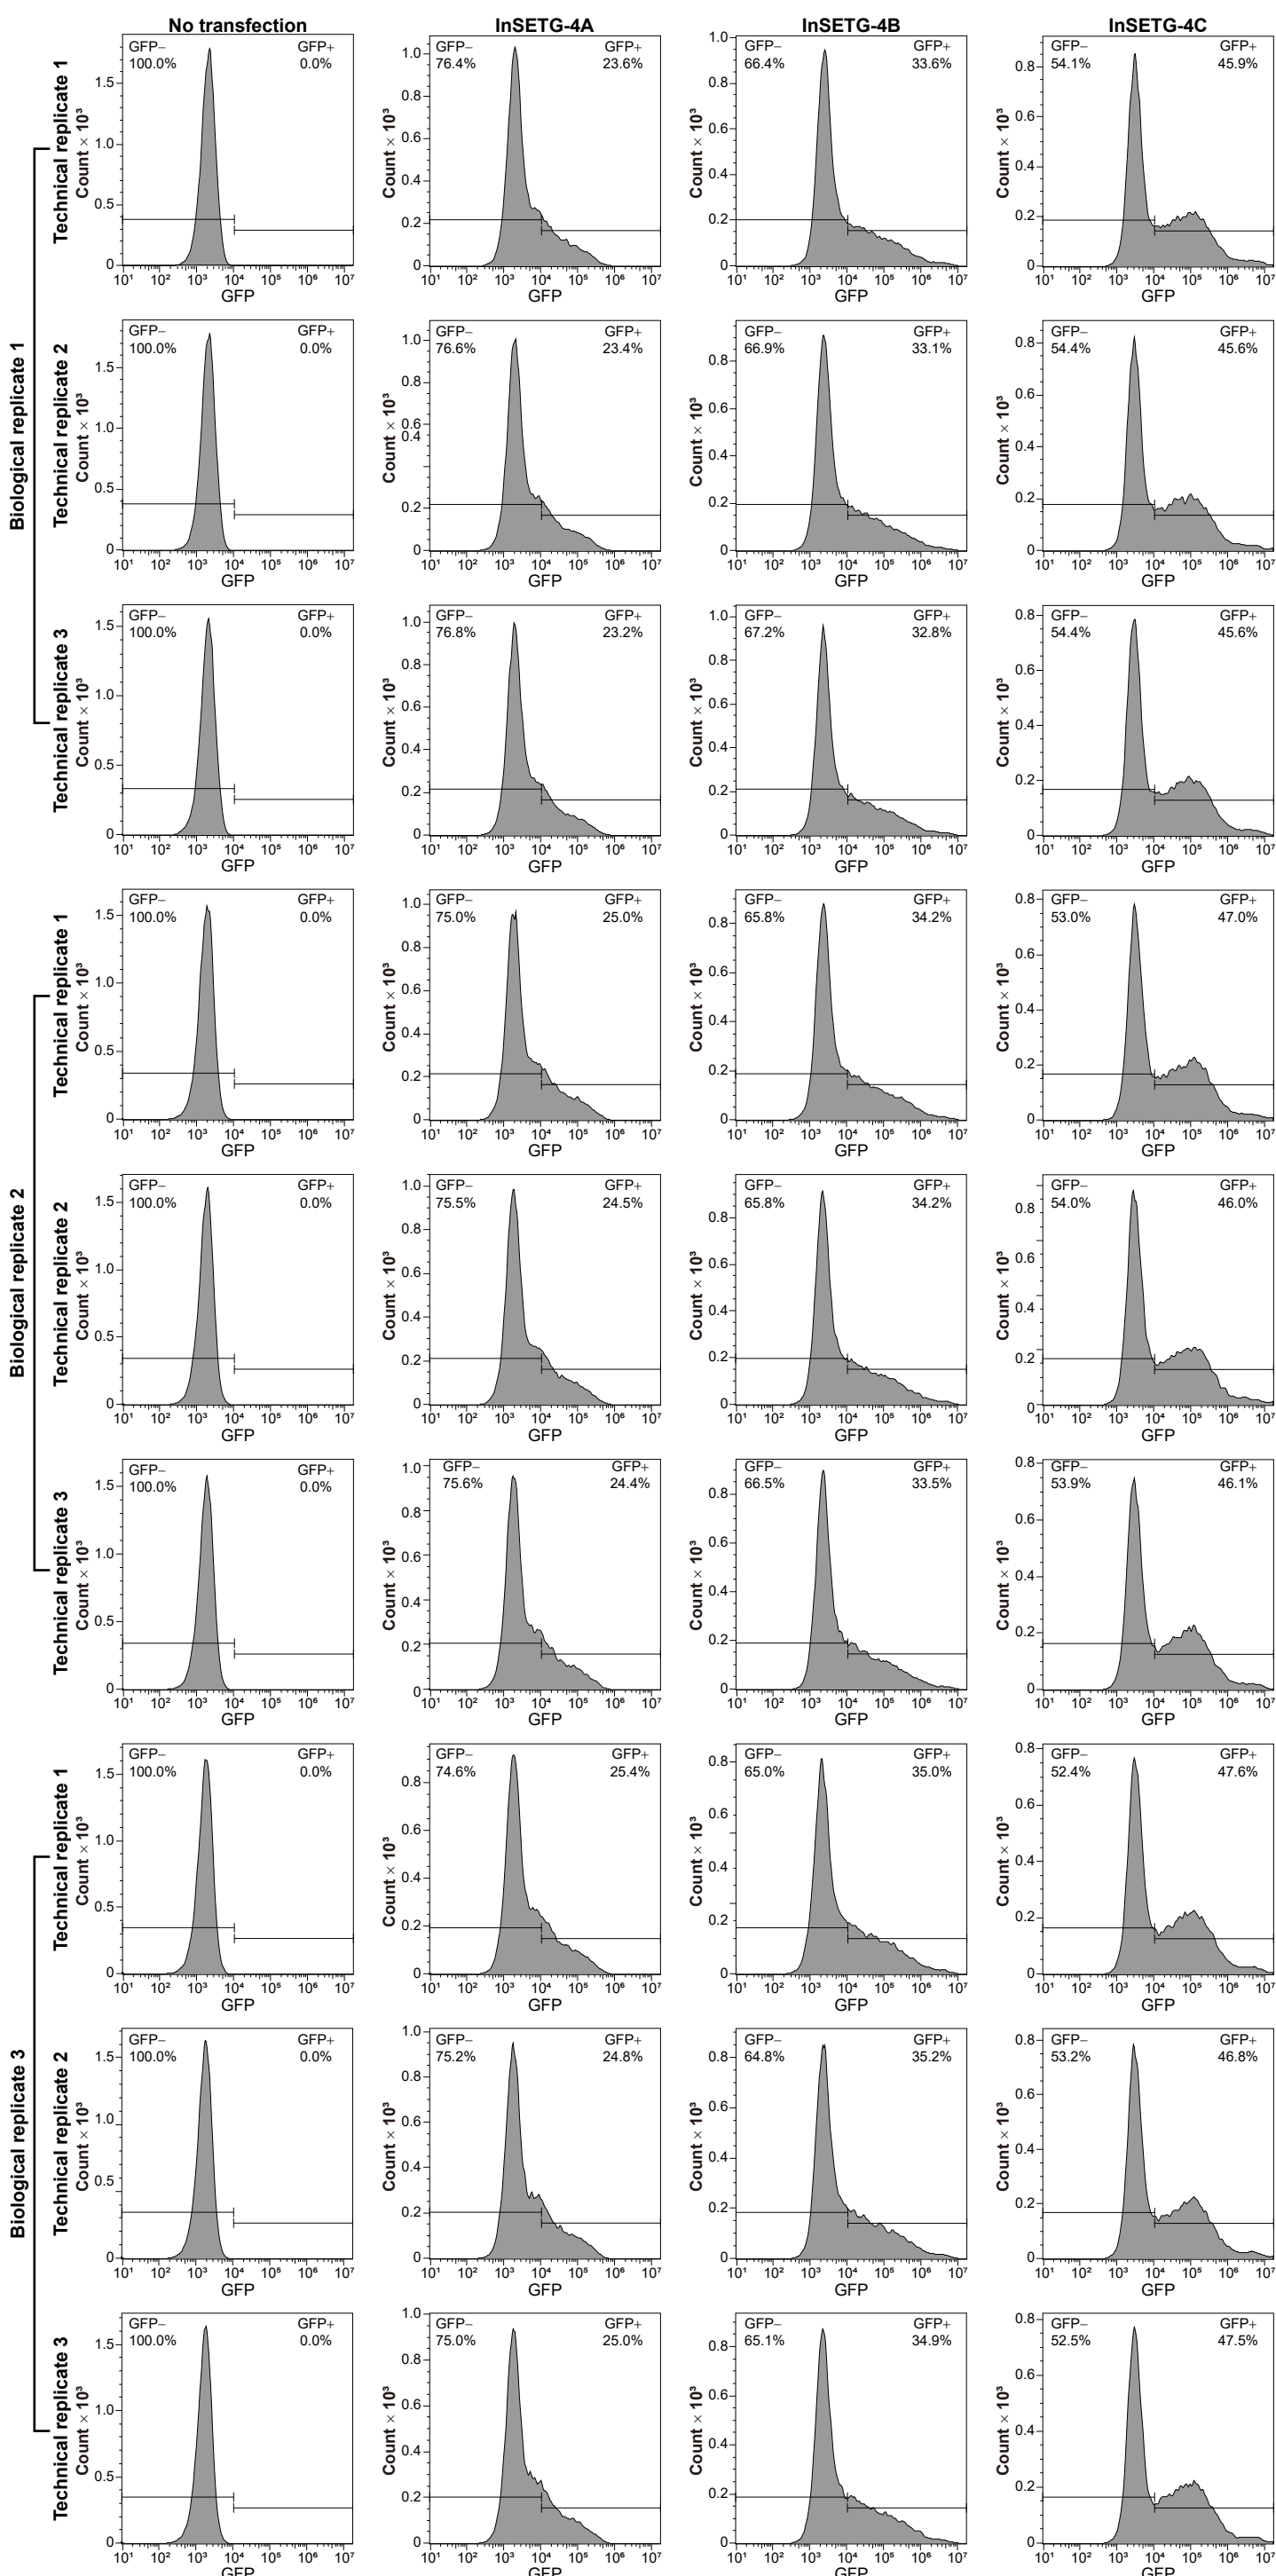

**Fig.S1. Confirmation of the protein-coding potential of *InSETG-4* using the ORF-GFP fusions. (A)** Expression of the ORF-GFP fusions of the *InSETG-4* transcripts in 293FT cells. Scale bar, 100  $\mu\text{m}$ . **(B)** Flow cytometry analysis of 293FT cells transfected with vectors containing ORF-GFP fusions of the *InSETG-4* transcripts. Three biological replicates are shown.
